# Supplementary figures and images for: Simvastatin downregulates adipogenesis in 3T3-L1 preadipocytes and orbital fibroblasts from Graves’ ophthalmopathy patients
Source: PubMed Central journal article supplement — Endocr Connect. 2019 Aug 5;8(9):1230–9. doi: 10.1530/EC-19-0319 (PMC6733370; doi:10.1530/ec-19-0319), 2019-08-05

# A IL-1 $\beta$

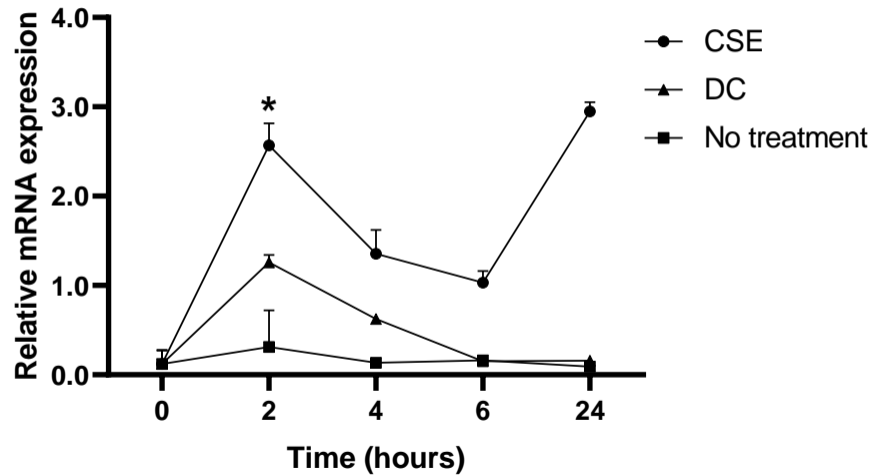

# B IL-6

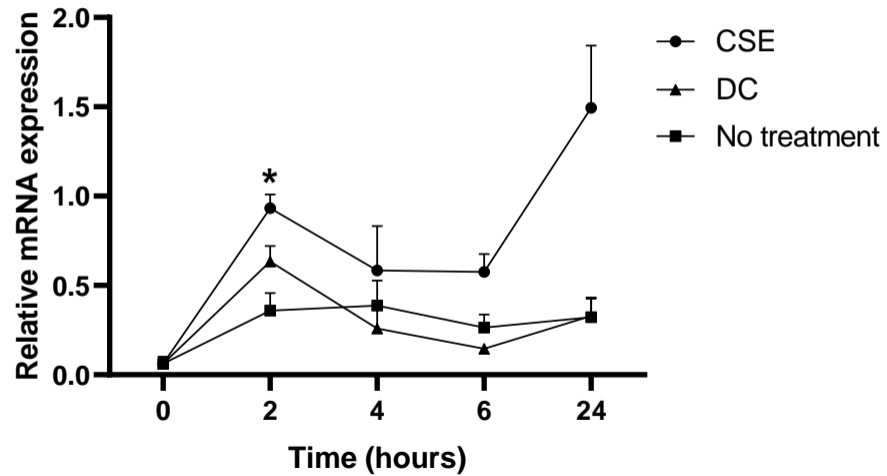

Supplement: supplementary_figure_1.pdf [file supplementary_figure_1.pdf]
